# Supplementary material for: Asbestos conceives Fe(II)-dependent mutagenic stromal milieu through ceaseless macrophage ferroptosis and β-catenin induction in mesothelium
Source: PubMed Central journal article supplement — Redox Biol. 2020 Jun 24;36:101616. doi: 10.1016/j.redox.2020.101616 (PMC7330611; doi:10.1016/j.redox.2020.101616), 2020-06-24
Supplement: mmc1.pdf [file mmc1.pdf]

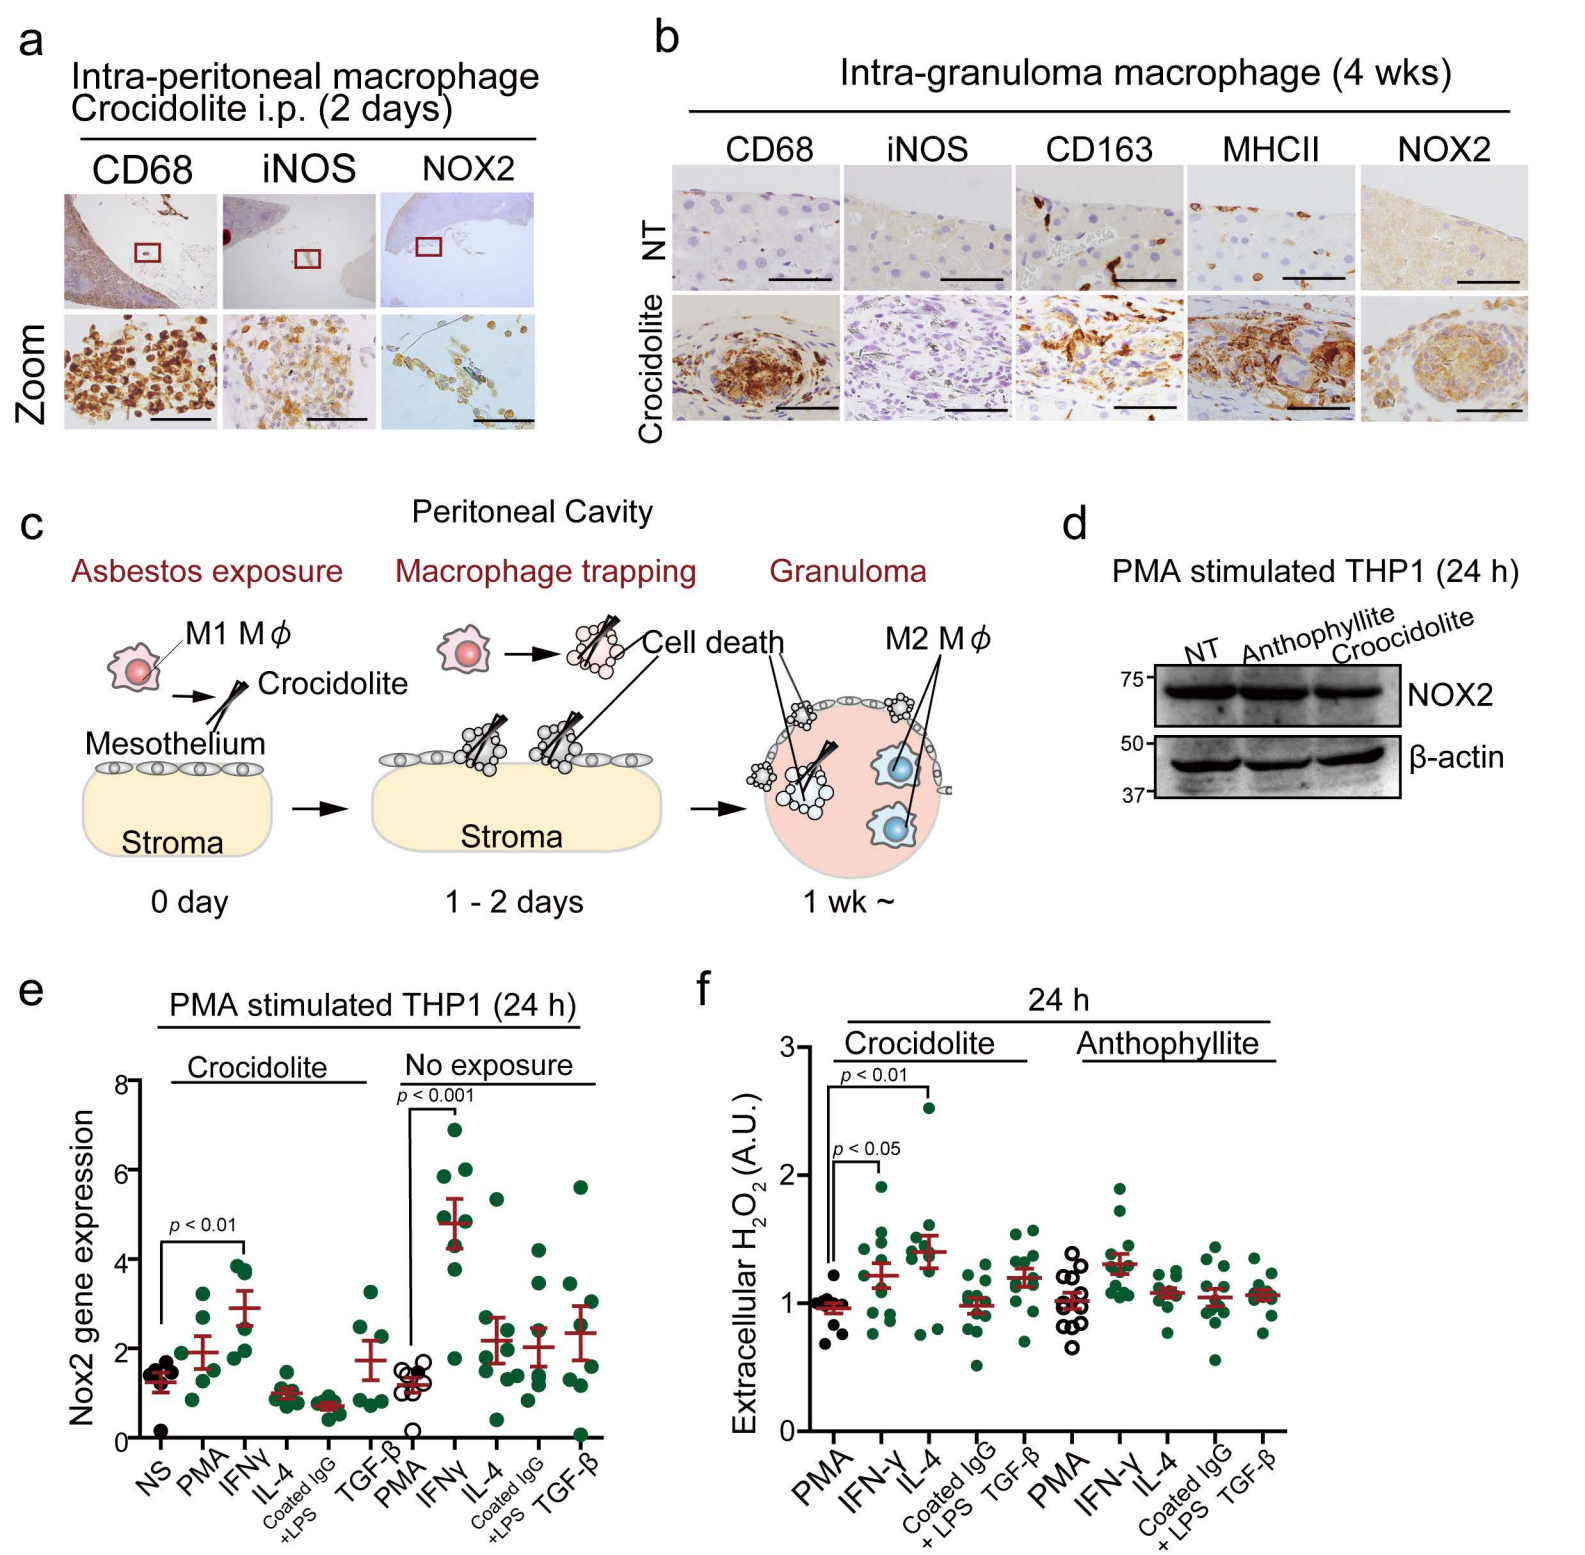

Figure S1

Rat peritoneal inflammatory cells

Fe(II)  
Low High

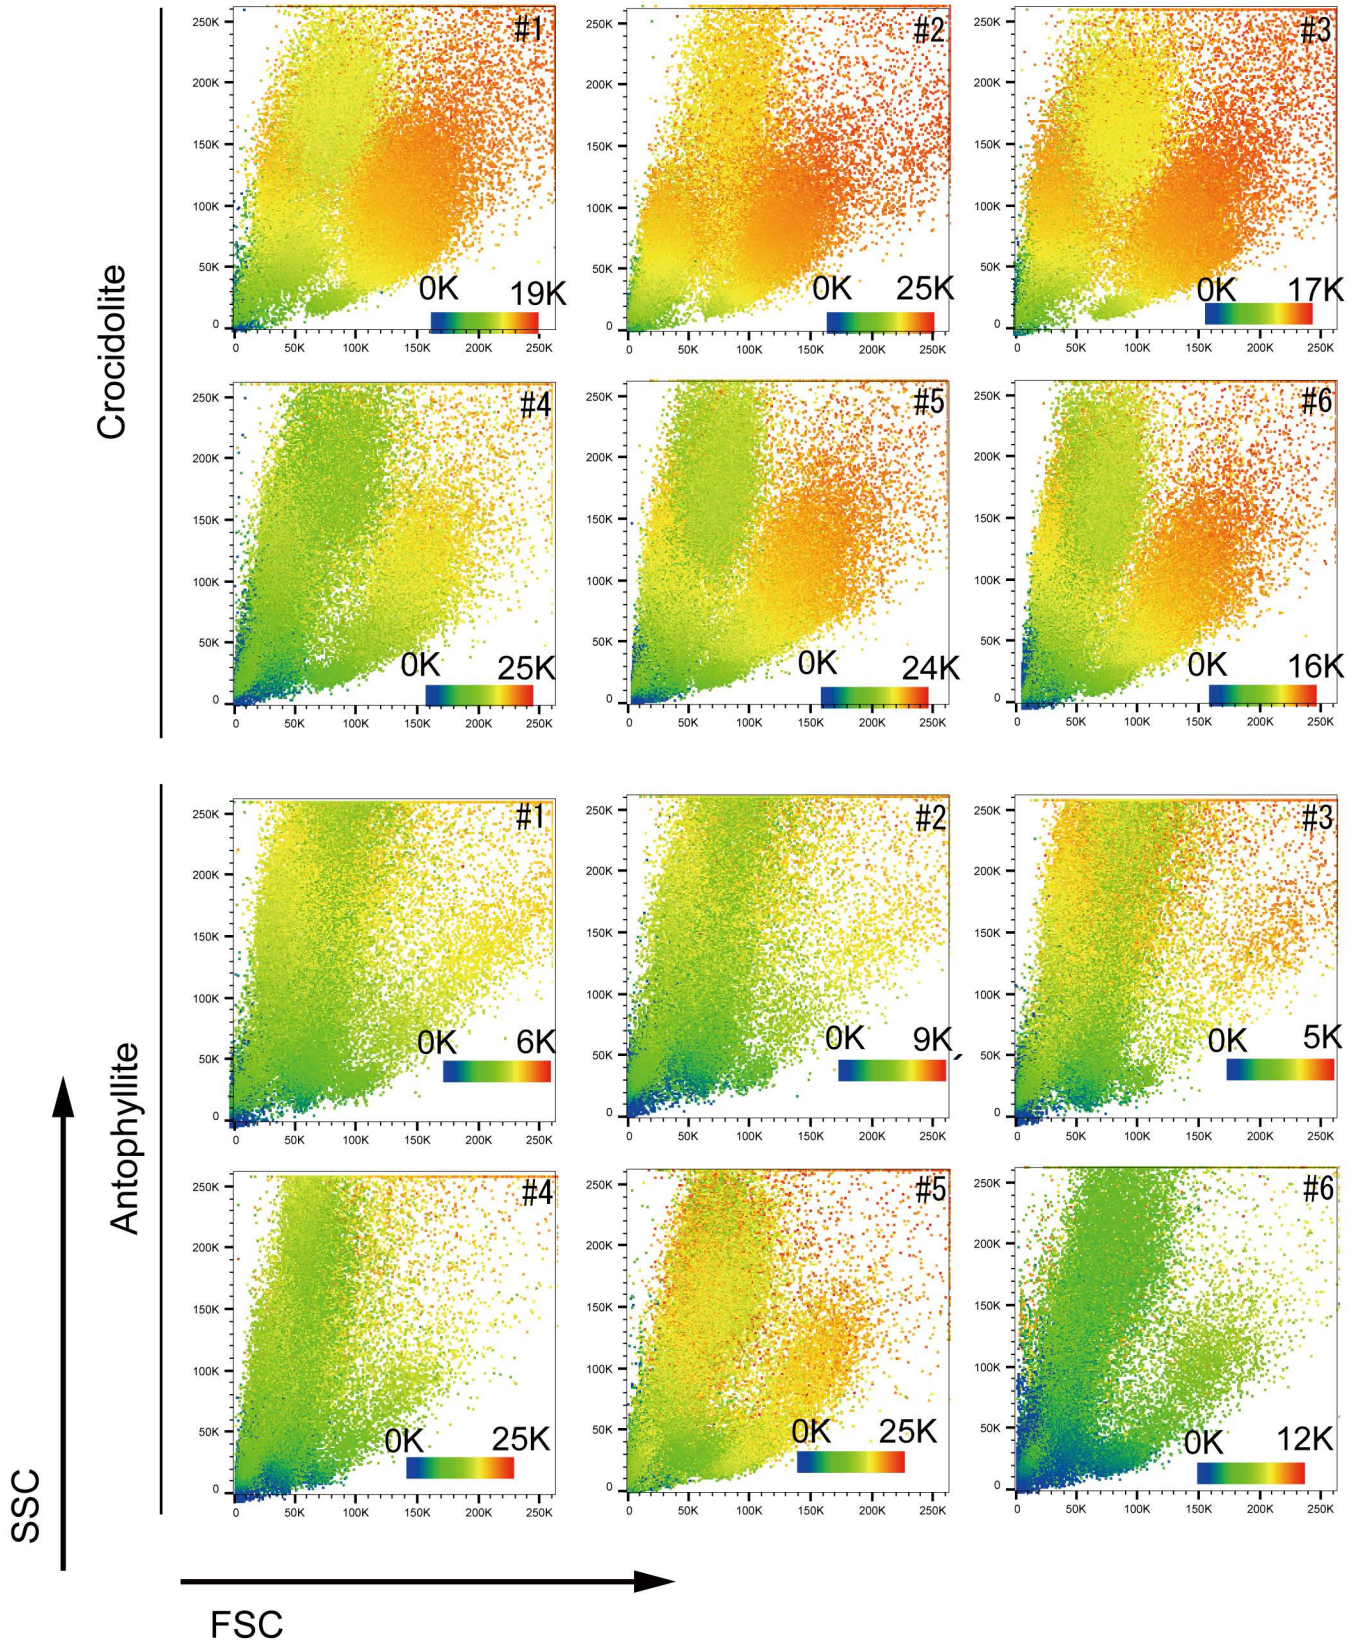

Figure S2

**a**

M2a THP1 (96 h)

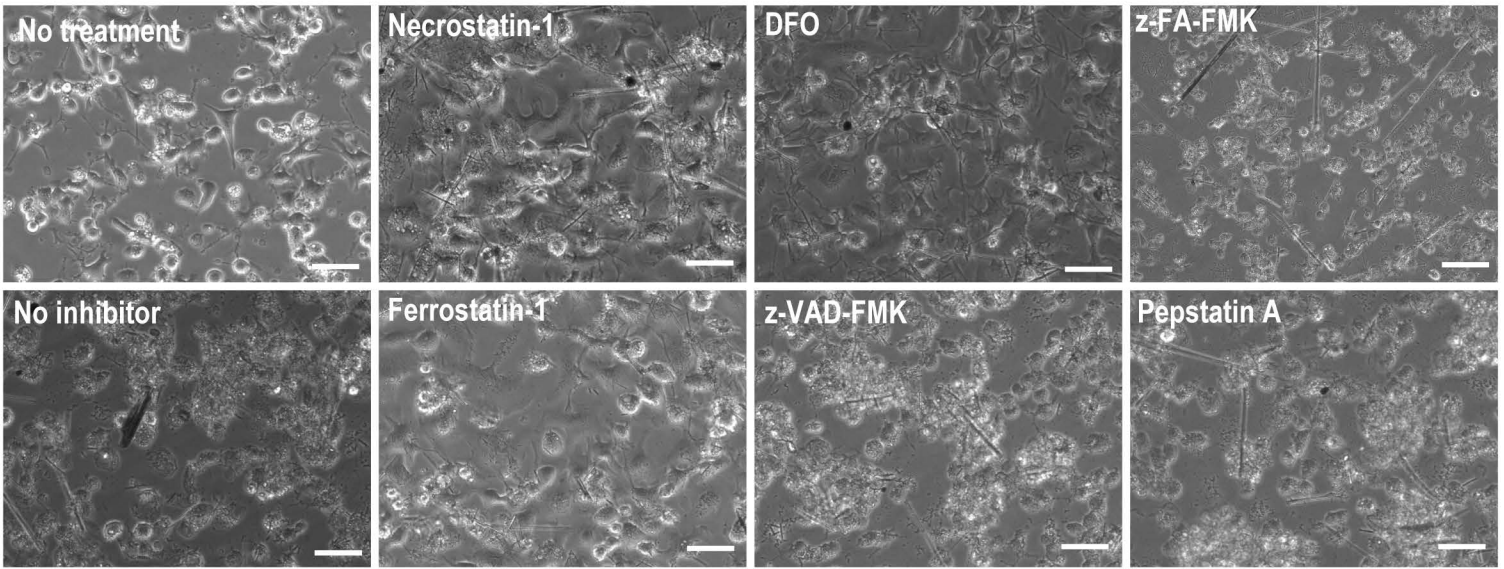**b**

Mesothelial cell (72 h)

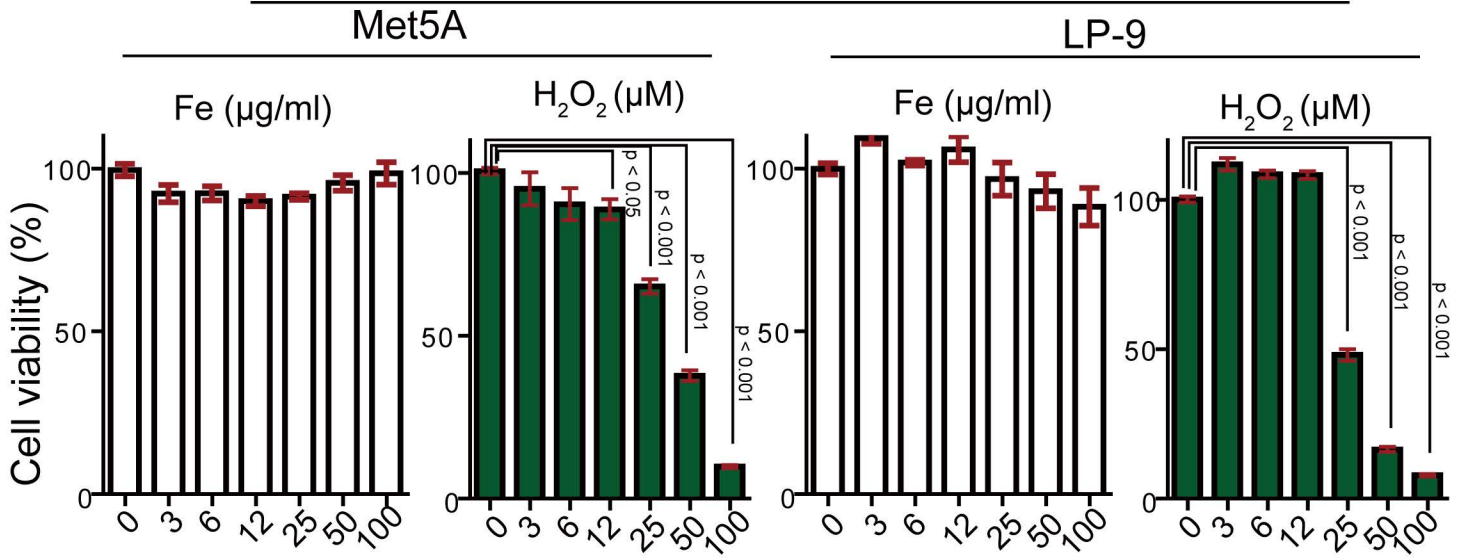**c**

Macrophage cells (72 h)

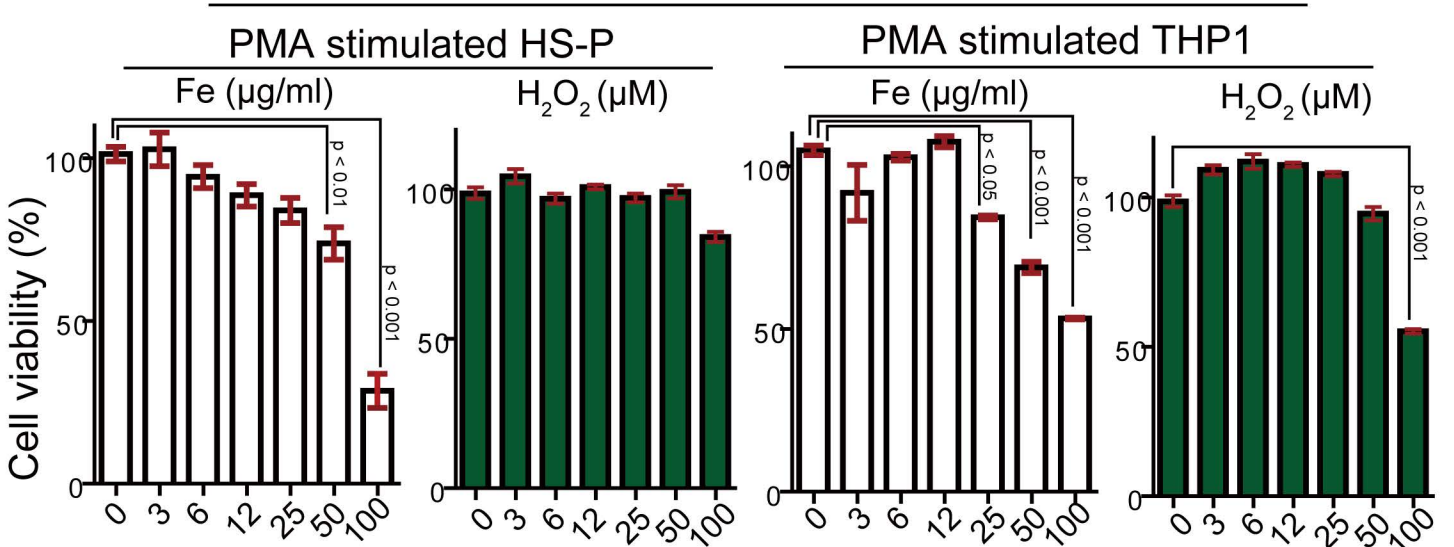

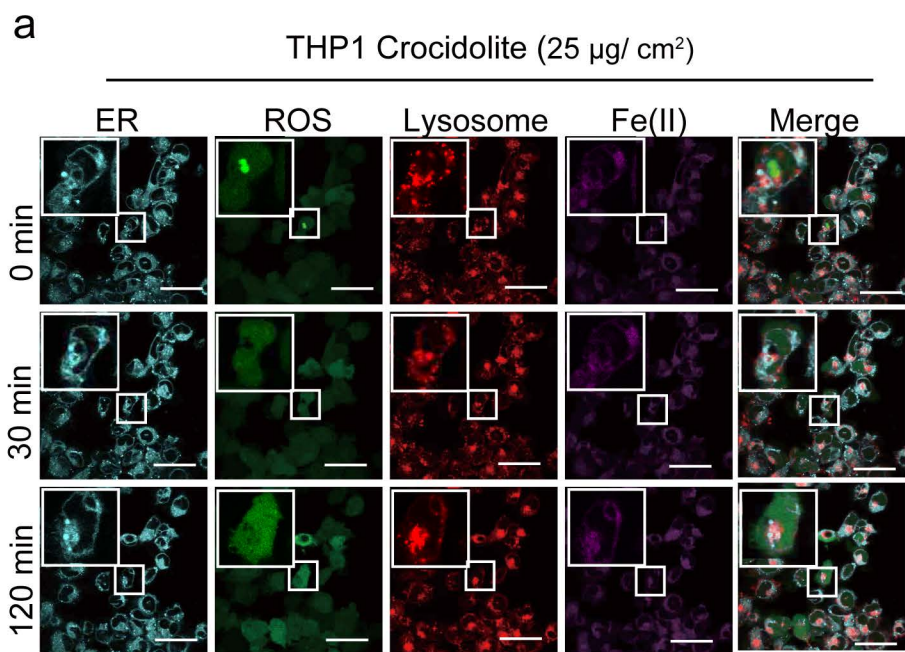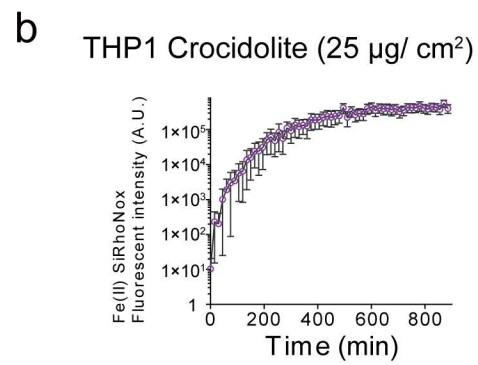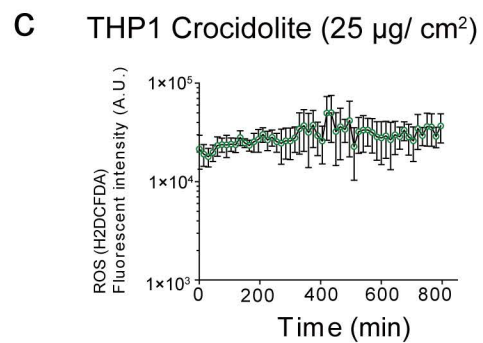

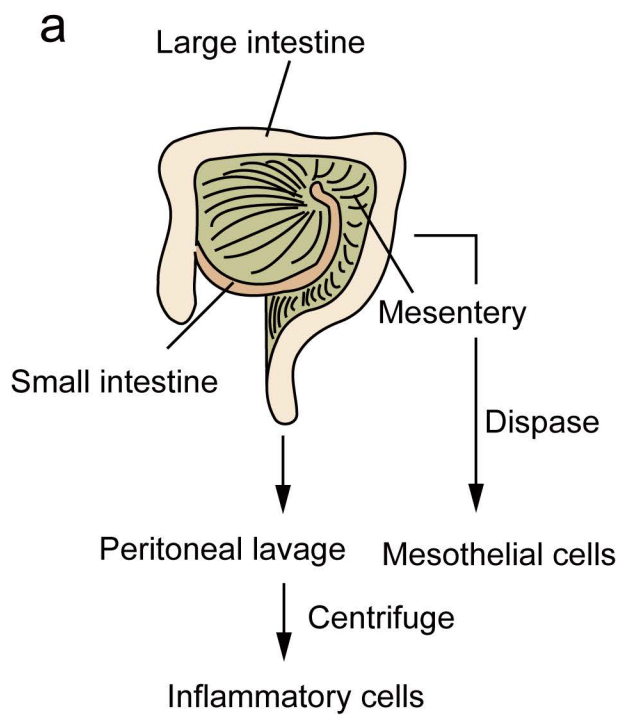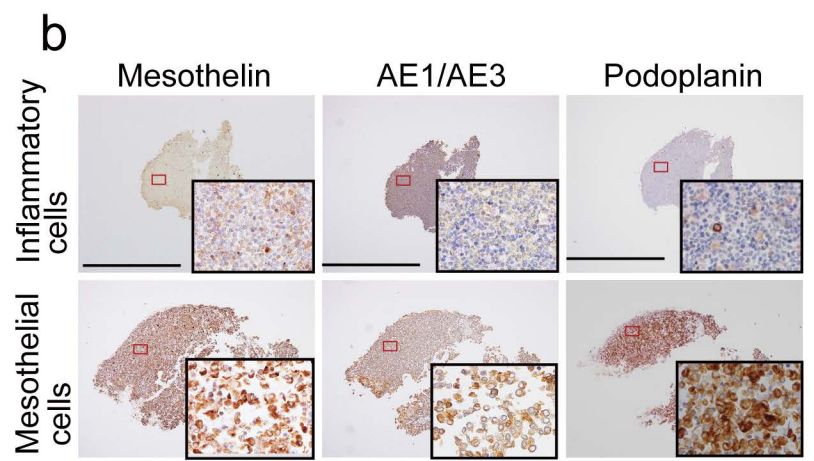

**c**

Mesothelial cells

|          | Mesothelin | AE1/AE3 | Podoplanin |
|----------|------------|---------|------------|
| Mean (%) | 88.58      | 90.24   | 85.09      |
| SEM      | 3.04       | 2.51    | 3.67       |

## Figure Legends for Supplementary Figures

### Figure S1. H<sub>2</sub>O<sub>2</sub> production by macrophage after asbestos exposure does not depend only on NOX2.

(a, b) Immunohistochemical analysis for the polarization of peritoneal and granuloma macrophages reveals M1-subtype for peritoneal macrophages (M1 marker: iNOS) and M2-subtype for granuloma macrophages, (M2 marker: CD163 and MHC II) both of which express NOX2 (NADPH oxidase 2). (c) Scheme of asbestos-induced tissue remodeling in the somatic cavity. After intraperitoneal asbestos injection, macrophages present a spectrum of phase-specific phenotypes. Asbestos exposure (0 day) induces intraperitoneal macrophages to recognize and migrate to asbestos. At macrophage trapping phase (1-2 days), asbestos causes cell death to macrophages (M1) and mesothelia. At granuloma formation phase (1 wk ~), mesothelia have completely recovered, when macrophages engulf asbestos with M2 differentiation in the granuloma. (d) Immunoblot analysis for NOX2 protein in PMA-stimulated THP1 macrophage reveals no remarkable change between anthophyllite and crocidolite 24 h after exposure. (e) qRT-PCR analysis of *Nox2* in a macrophage cell line, THP1, after polarization shows no remarkable effect of crocidolite. M0, PMA 5 ng/ml; M1, 20 ng/ml IFN- $\gamma$  + 10 ng/ml LPS; M2a: 20 ng/ml IL-4; M2b, IgG-coated wells + 100 ng/ml LPS; M2c, 0.5 ng/ml activated TGF- $\beta$ . (f) Extracellular H<sub>2</sub>O<sub>2</sub> (Amplex Red™) in the media of THP1 cells was higher after 24 h-exposure to crocidolite than to anthophyllite. The cells were differentiated into each subtype by stimulation with PMA (10  $\mu$ M), IFN- $\gamma$  (100 ng/ml), IL-4 (20 ng/ml), coated IgG and LPS (100 ng/ml) or TGF- $\beta$  (0.5 mg/ml), (means  $\pm$  SEM; N $\geq$ 7, scale: 100  $\mu$ m).

### Figure S2. Peritoneal macrophages accumulate catalytic Fe(II) after exposure to crocidolite but not to anthophyllite.

FACS analysis for catalytic Fe(II) in rat peritoneal inflammatory cells. Catalytic Fe(II) was detected by SiRhoNox-1 (633 nm) and heatmaps are shown according with catalytic Fe(II) concentration. The upper panels are 6 independent analyses of peritoneal lavage from rats intraperitoneally injected with crocidolite (4 wks); the lower 6 panels are from rats injected with anthophyllite (4 wks).

### Figure S3. Necrotic feature of macrophages after exposure to crocidolite and its partial

### rescue by various inhibitors for specific cell death.

(a) Phase contrast images of IL-4-stimulated THP-1 macrophage cells exposed to crocidolite ( $15 \mu\text{g}/\text{cm}^2$ ; NT, no-treatment; NI, no-inhibitor; necrostatin-1,  $40 \mu\text{M}$ , necroptosis inhibitor; ferrostatin-1,  $500 \text{ nM}$ , ferroptosis inhibitor; DFO,  $400 \mu\text{M}$ , redox-inactive iron chelator; z-VAD-FMK,  $184 \mu\text{M}$ , apoptosis inhibitor; z-FA-FMK,  $20 \mu\text{M}$ , lysosome-associated cell death inhibitor; pepstatinA,  $200 \mu\text{g}/\text{ml}$ , autophagic cell death inhibitor; bar =  $50 \mu\text{m}$ ). (b, c) Cell viability (MTT assay) for iron and  $\text{H}_2\text{O}_2$  toxicity reveals iron-resistance/ $\text{H}_2\text{O}_2$  sensitivity in mesothelial cells and iron sensitivity/ $\text{H}_2\text{O}_2$  resistance in macrophages. FAC (ferric ammonium acetate) and  $\text{H}_2\text{O}_2$  were exposed at different concentrations (0 to  $100 \mu\text{M}$ ; means  $\pm$  SEM;  $N \geq 4$ ).

### Figure S4. Propagation of ROS from lysosome to the entire cytoplasm in THP1 macrophage cells after exposure to crocidolite.

(a) Time-lapse imaging of M0-subtype THP1 macrophage exposed to crocidolite ( $25 \mu\text{g}/\text{cm}^2$ ) 24 h after differentiation reveals  $\text{H}_2\text{DCFDA}$ -positive ROS, starting from single granule in lysosome to propagate to the entire cytoplasmic area (magenta, SiRhoNox-1, catalytic  $\text{Fe}[\text{II}]$ ; red, LysoTracker, lysosome; green,  $\text{H}_2\text{DCFDA}$ , ROS; cyan, ER tracker, ER; bar =  $10 \mu\text{m}$ ). (b, c) Time-lapse imaging of  $\text{Fe}(\text{II})$  and ROS ( $\text{H}_2\text{DCFDA}$ ) quantification in M0 THP1 ( $10 \mu\text{M}$  PMA stimulated, 6 h; 0 to 13 h; means  $\pm$  SEM;  $N \geq 4$ ).

### Figure S5. Methods for collection and confirmation of rat mesothelial cells.

(a) A scheme of the collection of peritoneal lavage and mesothelial cells from rats. Dissected mesentery was incubated with dispase ( $1,000 \text{ pU}/\text{ml}$ ) at  $37 \text{ }^\circ\text{C}$  for 30 min. (b, c) Immunohistochemical confirmation of inflammatory cells and mesothelial cells (bar =  $1 \text{ mm}$ ).

**Table S1: KEY RESOURCES TABLE**

| REAGENT or RESOURCE              | SOURCE                        | IDENTIFIER       |
|----------------------------------|-------------------------------|------------------|
| <b>Antibodies</b>                |                               |                  |
| $\beta$ -catenin                 | Abcam                         | Cat# ab32572     |
| p $\beta$ -catenin (Ser 675)     | CST                           | Cat# 9567S       |
| c-myc                            | Abcam                         | Cat# ab32072     |
| $\gamma$ H2AX (Ser139)           | Merck                         | Cat# 05-636      |
| 53BP1                            | Abcam                         | Cat# ab36823     |
| 4HNE                             | JaICA                         | Cat# MHN-100P    |
| 8OHdG                            | JaICA                         | Cat# MOG-100P    |
| Ki67                             | Abcam                         | Cat# ab16667     |
| BrdU                             | Abcam                         | Cat# ab152095    |
| GSK3B                            | SANTA CRUZ                    | Cat# sc-9166     |
| TfR1                             | Thermo Fischer                | Cat# 13-6800     |
| FtL                              | Abcam                         | Cat# ab69090     |
| FtH                              | SANTA CRUZ                    | Cat# sc-25617    |
| $\beta$ -actin                   | Sigma aldrich                 | Cat# A1978-200UL |
| LaminB1                          | Abcam                         | Cat# ab16048     |
| Lamp2                            | SANTA CRUZ                    | Cat# 66301-1     |
| Mesothelin                       | IBL                           | Cat# 28001       |
| D2-40 (podoplanin)               | Sigma Aldrich                 | Cat# P2120       |
| AE1/AE3                          | Thermo Fischer                | Cat# MS-343-PO   |
| p15 (D-12)                       | SANTA CRUZ                    | Cat# sc-271791   |
| p16 (C-3)                        | SANTA CRUZ                    | Cat# sc-166760   |
| Necroptosis Antibody Sampler Kit | CST                           | Cat# 98110       |
| PARP1                            | Proteinthech                  | Cat# 13371-1-AP  |
| GPX4                             | Abcam                         | Cat# ab125066    |
| Cathepsin B                      | NBP                           | Cat# NBP1-86048  |
| CD68                             | BioRad                        | Cat# MCA341R     |
| iNOS                             | BD Transduction Laboratories™ | Cat# N32020/L20  |
| MHCII                            | Abcam                         | Cat# ab23990     |
| CD163                            | Abcam                         | Cat# ab182422    |
| CCRII                            | Abcam                         | Cat# ab227015    |
| NOX2/gp91 phox                   | Abcam                         | Cat# ab131083    |
| anti-mouse HRP                   | Dako                          | Cat# P0260       |
| anti-rabbit HRP                  | Dako                          | Cat# P0448       |



|                                      |            |              |
|--------------------------------------|------------|--------------|
| anti-mouse Alexa 488                 | Invitrogen | Cat# A11029  |
| anti-Rabbit Alexa 546                | Invitrogen | Cat# A11003  |
| anti-Rabbit Alexa 633                | Invitrogen | Cat# A21070  |
| anti-Digoxigenin/Digoxin Dylight 594 | Vector     | Cat# SA-5001 |

### Chemicals, Peptides, and Recombinant Proteins

|                                  |                       |                  |
|----------------------------------|-----------------------|------------------|
| PMA                              | Wako                  | Cat# 162-23591   |
| recombinantHuman IL-4            | PEPROTECH             | Cat# 200-04      |
| recombinant human IFN- $\gamma$  | PEPROTECH             | Cat# 300-02      |
| recombinant human TGF- $\beta$ 1 | R &D system           | Cat# 240-B-002   |
| recombinat human TNF- $\alpha$   | CST                   | Cat# 8922SC      |
| Human Gamma Globulin             | Jakson ImmunoResearch | Cat# 009-000-002 |
| recombinant mouse IL-4           | PEPROTECH             | Cat# 214-14      |
| recombinant human Wnt1           | PEPROTECH             | Cat# 120-17      |
| LiCl                             | Sigma Aldrich         | Cat# 203637-100G |
| LPS                              | Sigma Aldrich         | Cat# L4391-1MG   |

### Cell death inducer and inhibitor

|                              |               |                  |
|------------------------------|---------------|------------------|
| Ferrostatin 1                | Sigma Aldrich | Cat# SML0583-5MG |
| Erastin                      | Sigma Aldrich | Cat# E7781       |
| z-FA-FMK                     | SANTA CRUZ    | Cat# sc-201303   |
| Pepstatin A                  | TOCRIS        | Cat# 26305-03-3  |
| Necrostatin-1                | Sigma Aldrich | Cat# N9037       |
| z-VAD-FMK                    | R &D system   | Cat# FMK001      |
| Desferal for injection 500mg | Novaltis      | Cat# 873929      |

### Commercial Assays

|                                          |                |                  |
|------------------------------------------|----------------|------------------|
| Cell Count Reagent SF                    | Nacalai Tesque | Cat# 07553-15    |
| Cytotoxicity Detection Kit               | Sigma Aldrich  | Cat# 11644793001 |
| Amplite Red hydrogen peroxide assay      | AAT Bioquest   | Cat# 11011       |
| Cellular Glutathione Detection Assay Kit | CST            | Cat# 13859       |

### Recombimnant DNA

|                               |         |                |
|-------------------------------|---------|----------------|
| pcDNA3-EGFP                   | Addgene | Cat# 13031     |
| pLKO.1 puro                   | Addgene | Cat# 8453      |
| pFucci-G1 Orange              | MBL     | Cat# AM-V9003M |
| pFucci-S/G2/M Green (N+C)-Hyg | MBL     | Cat# AM-V9030M |
| pLH-stsgRNA3.1                | Addgene | Cat# 64118     |

|                                         |                                                                                                                   |                                                                                               |
|-----------------------------------------|-------------------------------------------------------------------------------------------------------------------|-----------------------------------------------------------------------------------------------|
| pHAGE-TO-nls-st1dCas9-3nls-3XTagBFP2    | Addgene                                                                                                           | Cat# 64512                                                                                    |
| <b>Experimental Models: Cell Lines</b>  |                                                                                                                   |                                                                                               |
| Human: HEK293T                          | RIKEN CELL BANK                                                                                                   | RCB2202                                                                                       |
| Human: Met5A                            | ATCC                                                                                                              | ATCC CRL-9444                                                                                 |
| Human: LP-9                             | CORIELL INSTITUTE                                                                                                 | AG07086                                                                                       |
| Human: THP-1                            | RIKEN CELL BANK                                                                                                   | RCB-1189                                                                                      |
| Mouse: RAW 264                          | RIKEN CELL BANK                                                                                                   | RCB0535                                                                                       |
| Rat: HS-P                               | RIKEN CELL BANK                                                                                                   | RCB1757                                                                                       |
| <b>Cell culture experiments</b>         |                                                                                                                   |                                                                                               |
| Fetal bovine serum                      | Nualille                                                                                                          | Cat# S1780                                                                                    |
| trypsin                                 | Nacalai Tesque                                                                                                    | Cat# 35555-54                                                                                 |
| Antibiotic-antimycotic                  | Nacalai Tesque                                                                                                    | Cat# 02892-54                                                                                 |
| RPMI1640 with PR                        | Wako                                                                                                              | Cat# 187-02025                                                                                |
| RPMI1640 without PR                     | Gibco                                                                                                             | Cat# 11835-030                                                                                |
| DMEM                                    | Wako                                                                                                              | Cat# 043-30085                                                                                |
| FluoroBrite DMEM                        | Gibco                                                                                                             | Cat# A18967-01                                                                                |
| PEI                                     | Polysciences, Inc.                                                                                                | Cat# 23966-1                                                                                  |
| FerroOrange                             | GORYO Chemical, Inc                                                                                               | Cat# GC904-01                                                                                 |
| FerroFarRed™                            | GORYO Chemical, Inc                                                                                               | Cat# GC903-01                                                                                 |
| LysoTracker Green DND-26                | Thermo Fisher Scientific                                                                                          | Cat# L7526                                                                                    |
| LysoTracker Red DND-99                  | Thermo Fisher Scientific                                                                                          | Cat# L7528                                                                                    |
| ERTracker Blue-white DPX                | Thermo Fisher Scientific                                                                                          | Cat# E12353                                                                                   |
| MitoTracker™ Green FM                   | Thermo Fisher Scientific                                                                                          | Cat# M7514                                                                                    |
| MitoTracker™ Deep Red FM                | Thermo Fisher Scientific                                                                                          | Cat# M22426                                                                                   |
| <b>Transmission electron microscope</b> |                                                                                                                   |                                                                                               |
| Gluthalaldehyde                         | TAAB                                                                                                              | Cat# 3032                                                                                     |
| Epon-812                                | TAAB                                                                                                              | Cat# R3244                                                                                    |
| DDSA EM                                 | TAAB                                                                                                              | Cat# R3252                                                                                    |
| MNA                                     | TAAB                                                                                                              | Cat# R3282                                                                                    |
| DMP-30                                  | TAAB                                                                                                              | Cat# R3268                                                                                    |
| <b>Software</b>                         |                                                                                                                   |                                                                                               |
| ImageJ                                  | <a href="https://imagej.nih.gov/ij/">https://imagej.nih.gov/ij/</a>                                               | RRID:SCR_003070                                                                               |
| GraphPad Prism 5                        | Graph Pad Software                                                                                                | RRID:SCR_002798                                                                               |
| Multiple experimental Viewer (MeV)      | <a href="http://mev.tm4.org/#/welcome">http://mev.tm4.org/#/welcome</a>                                           | N/A                                                                                           |
| GSEA                                    | <a href="http://software.broadinstitute.org/gsea/index.jsp">http://software.broadinstitute.org/gsea/index.jsp</a> | <a href="#">2005</a> , <a href="#">PNAS</a> <a href="#">102</a> , <a href="#">15545-15550</a> |

GSEA <http://software.broadinstitute.org/gsea/index.jsp> [2003, Nat Genet 34, 267-273](#)

Ape – A plasmid Editor <https://jorgensen.biology.utah.edu/wayned/ape/> RRID:SCR\_014266

**Table S2 Primer used for RT-PCR assay.**

| <b>Primer Name</b>                | <b>Primer Sequence</b>                                                         |
|-----------------------------------|--------------------------------------------------------------------------------|
| <i><math>\beta</math>-catenin</i> | Fwd: (5'-GAAGGTGCTGTCTGTCTGCT-3')<br>Rev: (5'-TAGTCGCTGCATCGGACAAG-3')         |
| <i>MET</i>                        | Fwd: (5'-CAGTGACCTGCTGAAGCTGA-3')<br>Rev: (5'-ACAGGAAGAGCCCGGATACT-3')         |
| <i>EGFR</i>                       | Fwd: (5'-CAACACCCTGGTCTGGAAGT-3')<br>Rev: (5'-GCCCTTCTGGTTGTTGACAT-3')         |
| <i>TGFRB1</i>                     | Fwd: (5'-ACCTTCTGATCCATCCGTTG-3')<br>Rev: (5'-AGCTGTCAGCCTAGCTGCTC-3')         |
| <i>GAPDH</i>                      | Fwd: (5'-TGACTCTACCCACGGCAAGTTCAA-3')<br>Rev: (5'-ACGACATACTCAGCACCAGCATCA-3') |

**Table S3 Oligo used for knockdown assay.**

| gene                              | shRNA Oligo sequence                                                                                                                                   |
|-----------------------------------|--------------------------------------------------------------------------------------------------------------------------------------------------------|
| <i><math>\beta</math>-catenin</i> | Fwd: (5'-CCGTTGTTATCAGAGGACTAAATACTCGAGTATTTAGTCCTCTGATAACAATTTTTG-3')<br>Rev: (5'-AATCCTTGTTATCAGAGGACTAAATACTCGAGTATTTAGTCCTCTGATAACAATTTTTG-3')     |
| Scramble                          | Fwd: (5'-CCGTAATAGCGACTAAACACATCAATTCAAGAGATTGATGTGTTTAGTCGCTATTTTTTTG-3')<br>Rev: (5'-AATCAAAAAAATAGCGACTAAACACATCAATCTTGAATTGATGTGTTTAGTCGCTATTG-3') |

**Table S4 Oligo used for CasFISH assay.**

| gene       | sgRNA Oligo sequence                         | sgRNA vector   | Cas9     |
|------------|----------------------------------------------|----------------|----------|
| <i>p16</i> | Fwd: (5'-ACGGATCGGGGATGTCTGCAGAGGGCAGAAG-3') | addgene #64118 | st dCad9 |
|            | Rev: (5'-AGACCTGGCCCTAGCCTCCATGTAGCAGAAA-3') | addgene #64118 | st dCad9 |
